# Supplementary material
Source: PubMed Central journal article supplement (PMC7282480)
Supplement: NIHMS1035352-supplement-Digital_Appendix_1.pdf [file NIHMS1035352-supplement-Digital_Appendix_1.pdf]

Supplemental digital content for Chen SF, Deitz J, Batten JN, et al. A multi-institution collaboration to define core content and design flexible curricular components for a foundational medical school course: Implications for national curriculum reform. Acad Med.

## **Supplemental Digital Appendix 1**

### **Guiding Principles for Defining Core Content**

1. Fundamental to understanding more generalizable concepts; e.g., bacterial pathogenesis
2. Important implication in understanding burden of disease; e.g., epidemiologic features of prevalent infection
3. Evergreen (i.e., known to be true or at least “verified” in a rigorous manner); e.g., clinical manifestations of specific infection, role of immune system in disease presentation
4. Foundational building blocks for understanding next level of core knowledge; e.g., immunologic response to class of pathogens
5. Not simply an easily searchable fact; e.g., size of TB genome
6. Regarded as important subject area by both basic science and clinical experts; e.g., TB
7. Utilized on a regular basis by practicing primary care physician or general specialist; e.g., recognizing at risk populations
8. Explicable; building on prior knowledge; e.g., immune reconstitution inflammatory response with TB & HIV Rx
9. Deliverable as an illness script; e.g., symptoms plus signs leading to the diagnosis of a specific illness
10. Frequently misunderstood in clinical practice; e.g., optimal duration of antibiotic therapy is known
11. Led to the uncovering of big ideas; e.g., bacterial genetics and antimicrobial resistance
12. Counterintuitive; the host response causes much of the morbidity attributable to infectious diseases

Supplemental digital content for Chen SF, Deitz J, Batten JN, et al. A multi-institution collaboration to define core content and design flexible curricular components for a foundational medical school course: Implications for national curriculum reform. Acad Med.

## **Supplemental Digital Appendix 2**

### **Course Learning Objectives**

- Outline the clinical approach to a patient with a suspected a suspected infection
- Describe the microbial characteristics that determine their disease-causing potential
- Discuss the role of the host immune response in the susceptibility and manifestations of infectious diseases
- Name the strategies available for the prevention and treatment of infections
- Summarize the domestic and global impact of the infectious diseases

Supplemental digital content for Chen SF, Deitz J, Batten JN, et al. A multi-institution collaboration to define core content and design flexible curricular components for a foundational medical school course: Implications for national curriculum reform. Acad Med.

### Supplemental Digital Appendix 3

#### Open-Ended Survey Questions by School

| School   | Qualitative Questions                                                                                                                                                                                                                                                                                                                                                                                                                                                                                                                                                                                                                                                                                                                                                                                                                                                                                                                         |
|----------|-----------------------------------------------------------------------------------------------------------------------------------------------------------------------------------------------------------------------------------------------------------------------------------------------------------------------------------------------------------------------------------------------------------------------------------------------------------------------------------------------------------------------------------------------------------------------------------------------------------------------------------------------------------------------------------------------------------------------------------------------------------------------------------------------------------------------------------------------------------------------------------------------------------------------------------------------|
| Stanford | <ul style="list-style-type: none"> <li>• Specific comments about module videos/interactive sessions:</li> <li>• Comments about the Microbiology and Infectious Diseases curriculum. Please consider:               <ol style="list-style-type: none"> <li>1. Strengths, weaknesses, opportunities for improvement</li> <li>2. Quality of the components (springboard and content videos, Q&amp;A with Bagels sessions, interactive sessions, mid-course and final exam questions)</li> <li>3. How the design of the modules impacted your learning</li> <li>4. Integration with other aspects of the curriculum</li> <li>5. Interface design (were online materials accessible/easy to use?)</li> <li>6. Amount of time required to complete each module</li> <li>7. Views about the use of flipped classroom format versus traditional lecture format</li> </ol> </li> </ul>                                                                 |
| UCSF     | <ul style="list-style-type: none"> <li>• How did the design of the Fungal Infections, Mycobacterial Infections, Enterovirus &amp; Arbovirus Infections, Hepatitis, Helminths, and Protozoa modules impact your learning of the content? (Consider springboards, narrated PowerPoints, and interactive session)</li> <li>• How would you compare your ability to learn content between traditional lectures and the Fungal Infections, Mycobacterial Infections, Enterovirus &amp; Arbovirus Infections, Hepatitis, Helminths, and Protozoa modules?</li> <li>• Comment on the interface design (including accessibility) of the online materials. Consider strengths, weaknesses, areas for improvement.</li> <li>• Comment on the adequacy of scheduled time in the curriculum to complete the modules (Fungal Infections, Mycobacterial Infections, Enterovirus &amp; Arbovirus Infections, Hepatitis, Helminths, and Protozoa).</li> </ul> |

Supplemental digital content for Chen SF, Deitz J, Batten JN, et al. A multi-institution collaboration to define core content and design flexible curricular components for a foundational medical school course: Implications for national curriculum reform. Acad Med.

|      |                                                                                                                                                                                                                                                                                                                                                                                                                                                                                                                                                                                                                                                                                                                                                                                                                                                                                                              |
|------|--------------------------------------------------------------------------------------------------------------------------------------------------------------------------------------------------------------------------------------------------------------------------------------------------------------------------------------------------------------------------------------------------------------------------------------------------------------------------------------------------------------------------------------------------------------------------------------------------------------------------------------------------------------------------------------------------------------------------------------------------------------------------------------------------------------------------------------------------------------------------------------------------------------|
|      | <ul style="list-style-type: none"> <li>• Comment on the integration and timing of the modules (Fungal Infections, Mycobacterial Infections, Enterovirus &amp; Arbovirus Infections, Hepatitis, Helminths, and Protozoa) in relation to the larger I-3 curriculum and assessments.</li> </ul>                                                                                                                                                                                                                                                                                                                                                                                                                                                                                                                                                                                                                 |
| UW   | <p>Comments about the interactive sessions:</p> <p>Comments about the Invaders and Defenders curriculum. Please consider:</p> <ul style="list-style-type: none"> <li>• Strengths, weaknesses, opportunities for improvement</li> <li>• Quality of the components (springboard and content videos, Q&amp;A with Bagels sessions, interactive sessions, mid-course and final exam questions)</li> <li>• How the design of the modules impacted your learning</li> <li>• Integration with other aspects of the curriculum</li> <li>• Interface design (were online materials accessible/easy to use?)</li> <li>• Amount of time required to complete each module</li> <li>• Views about the use of flipped classroom format versus traditional lecture format</li> <li>• Specific comments about any of the module videos/interactive sessions (Pneumococcus, Tuberculosis, Infections of the Heart)</li> </ul> |
| Duke | <p>Comments about the videos. Please consider:</p> <ul style="list-style-type: none"> <li>• Effectiveness of the module in defining and meeting learning objectives; Quality, educational value and organization of the video content; Integration of concepts in microbiology, immunology and clinical medicine</li> <li>• Workload associated with the module</li> </ul>                                                                                                                                                                                                                                                                                                                                                                                                                                                                                                                                   |
